# Supplementary material for: PDGF signaling specificity is mediated through multiple immediate early genes
Source: Springer Nature journal article supplement (doi:10.1038/ng1922), 2006-12-03
Supplement: ng1922-S4.pdf [file ng1922-S4.pdf]

**Supplementary Table 1: Gene identification and insertion site**

| <b>ROSA</b> | <b>ref seq</b> | <b>Symbol</b> | <b>Name</b>                                  | <b>chr</b> | <b>insertion</b>        | <b>CDS</b>            |
|-------------|----------------|---------------|----------------------------------------------|------------|-------------------------|-----------------------|
| 72          | NM_009551      | Zfand5        | zinc finger, AN1-type domain 5               | 19         | 1st intron              | upstream              |
| 73          | NM_001024708   | BC058969      | BC058969 (similar to cdh11 precursor)        | 8          | 1st intron              | upstream              |
| 74          | NM_181072      | Myole         | myosin IE                                    | 9          | 1st intron              | 1 aa                  |
| 75          | NM_023598      | Arid5b        | AT rich interactive domain 5B                | 10         | 4th intron              | 283 aa                |
| 76          | NM_001001737   | BC055757      | cDNA sequence BC055757                       | 19         | 1st intron              | 1 aa                  |
| 77          | NM_013928      | Schip1        | schwannomin interacting protein 1            | 3          | 2nd intron              | 134 aa                |
| 78          | NM_009163      | Sgpl1         | sphingosine phosphate lyase 1                | 10         | 2nd intron              | 9 aa                  |
| 79          | NM_178892      | Tiparp        | TCDD-inducible poly(ADP-ribose) polymerase   | 3          | 1st intron              | upstream              |
| 80          | NM_153287      | Axud1         | AXIN1 up-regulated 1                         | 9          | 2nd intron              | 67 aa                 |
| 81          | AY149175       | Mzf6d         | KRAB zinc finger protein 6D                  | 13         | unknown <sup>1</sup>    | upstream <sup>1</sup> |
| 82          | NM_133942      | Plekha1       | pleckstrin homology domain family A1         | 7          | 3rd intron              | 82 aa                 |
| 83          | NM_023719      | Txnip         | thioredoxin interacting protein <sup>2</sup> | 3          | 8th intron <sup>2</sup> | unknown <sup>2</sup>  |

Consistent with previous gene trap mutations generated in our laboratory, all mutations are designated as ROSA (Reverse Orientation Splice Aceptor; <http://www.fhcr.org/science/labs/soriano/trap.html>). Following the mouse nomenclature committee guidelines, the mutation in *Zfand5* is thus referred to as *Zfand5*<sup>Gt(ROSA)72Sor</sup>, or ROSA72 for short. The insertion of gene trap construct is noted relative to intron number and the coding start site (CDS). <sup>1</sup>The intron/exon structure of the *Mzf6d* gene is unknown due to repetitive sequences in this region of chromosome 13. However, the 3' RACE product of *Mzf6d* overlaps with the start of the predicted coding start site, indicating that the insertion site is likely upstream of the coding sequence. <sup>2</sup>The insertion into the 8<sup>th</sup> intron of *Txnip* is actually in the reverse orientation for this gene, indicating that the trapped gene may be a novel gene anti-sense to *Txnip*.
